# Supplementary figures and images for: Metatranscriptomic insights on gene expression and regulatory controls in Candidatus Accumulibacter phosphatis
Source: PubMed Central journal article supplement — ISME J. 2015 Nov 10;10(4):810–22. doi: 10.1038/ismej.2015.155 (PMC4796919; doi:10.1038/ismej.2015.155), 2015-11-10

# Determining a cut-off for high expression

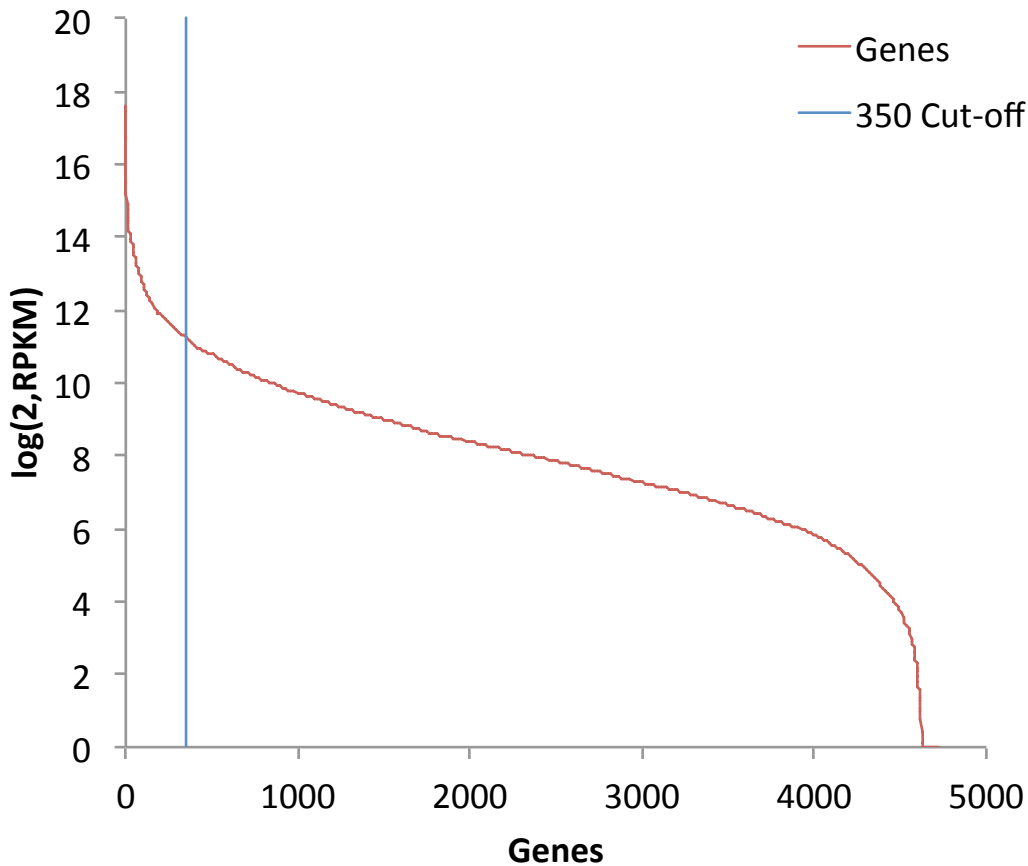

Supplement: ismej2015155x10.pdf [file ismej2015155x10.pdf]
